# Supplementary material for: Oncogenic long noncoding RNA landscape in breast cancer
Source: Springer Nature journal article supplement (doi:10.1186/s12943-017-0696-6), 2017-07-24

**A**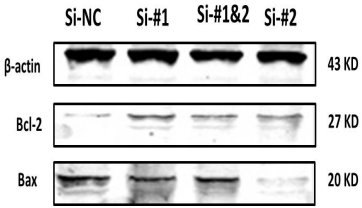**B**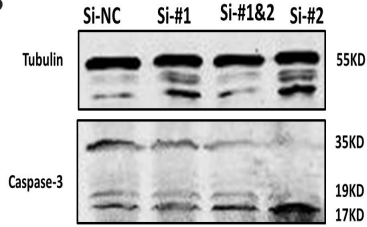**C**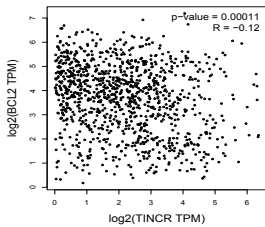**D**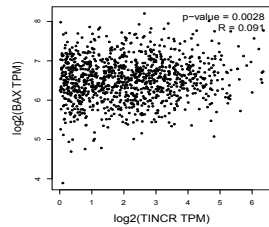**E**

| label | Category | Gene                                                                                       | Item | FC (Gene) | Q (Gene) | % Differ (Gene) |
|-------|----------|--------------------------------------------------------------------------------------------|------|-----------|----------|-----------------|
| GO:BP | GOBP     | cytoskeleton reorganization                                                                | KEGG | 7         | 4.1      | 3.6E-3          |
| GO:BP | GOBP     | positive regulation of cell motility                                                       | KEGG | 3         | 1.8      | 5.6E-3          |
| GO:BP | GOBP     | establishment of skin barrier                                                              | KEGG | 3         | 1.8      | 5.6E-3          |
| GO:BP | GOBP     | cytokeratin-dependent cell-cell adhesion via plasma membrane cell-cell adhesion molecules  | KEGG | 3         | 1.8      | 5.2E-3          |
| GO:BP | GOBP     | mitotic cohesions                                                                          | KEGG | 3         | 1.8      | 2.3E-2          |
| GO:BP | GOBP     | cell-cell adhesion                                                                         | KEGG | 7         | 4.1      | 2.3E-2          |
| GO:BP | GOBP     | transcription from the adenovirus II promoter                                              | KEGG | 10        | 5.8      | 2.4E-2          |
| GO:BP | GOBP     | cytoskeletal transport                                                                     | KEGG | 2         | 1.2      | 2.4E-2          |
| GO:BP | GOBP     | cytoskeleton-mediated ubiquitin-dependent proteolysis                                      | KEGG | 6         | 3.5      | 2.5E-2          |
| GO:BP | GOBP     | epithelial cell proliferation                                                              | KEGG | 7         | 4.2      | 3.6E-2          |
| GO:BP | GOBP     | angiogenic sprouting, cellular cell adhesion pathway                                       | KEGG | 4         | 2.3      | 3.9E-2          |
| GO:BP | GOBP     | cytoskeletal homeostasis maintenance                                                       | KEGG | 2         | 1.2      | 4.0E-2          |
| GO:BP | GOBP     | RNA secondary structure formation                                                          | KEGG | 3         | 1.8      | 4.4E-2          |
| GO:BP | GOBP     | protein complex assembly                                                                   | KEGG | 2         | 1.2      | 5.3E-2          |
| GO:BP | GOBP     | protein reorganization                                                                     | KEGG | 3         | 1.8      | 5.4E-2          |
| GO:BP | GOBP     | regulation of neural precursor cell proliferation                                          | KEGG | 2         | 1.2      | 6.3E-2          |
| GO:BP | GOBP     | regulation of cell proliferation                                                           | KEGG | 5         | 2.8      | 6.4E-2          |
| GO:BP | GOBP     | regulation of cellular amino acid metabolic process                                        | KEGG | 3         | 1.8      | 6.4E-2          |
| GO:BP | GOBP     | ubiquitin-dependent cell invasion, cell extension                                          | KEGG | 2         | 1.2      | 7.1E-2          |
| GO:BP | GOBP     | protein ubiquitination                                                                     | KEGG | 7         | 4.1      | 7.2E-2          |
| GO:BP | GOBP     | positive regulation of canonical Wnt signaling pathway                                     | KEGG | 4         | 2.3      | 7.4E-2          |
| GO:BP | GOBP     | positive regulation of cellular protein metabolic process                                  | KEGG | 2         | 1.2      | 8.2E-2          |
| GO:BP | GOBP     | protein recruitment and recruitment of cytoskeletal proteins via RHO class 1 GTP-dependent | KEGG | 3         | 1.8      | 8.2E-2          |
| GO:BP | GOBP     | cytoskeleton assembly                                                                      | KEGG | 2         | 1.2      | 9.3E-2          |
| GO:BP | GOBP     | MAPK1 signaling pathway                                                                    | KEGG | 3         | 1.8      | 1.1E-1          |

**F**

|                                    |                                                          |         |
|------------------------------------|----------------------------------------------------------|---------|
| Position 360-385 of PLAC2 3' UTR   | 5' ...AATCCCGGTT-GGAGAGCTTCAAGG...<br>  :    :    :      | 7mer-m8 |
| hsa-miR-125a                       | 3' ...GUGUCCAAUUCUUGAGAGUCCU...                          |         |
| Position 360-385 of PLAC2 3' UTR   | 5' ...AATCCCGGTT-GGAGAGCTTCAAGG...<br>  :    :    :      | 7mer-m8 |
| hsa-miR-125b                       | 3' ...AGTGTGTCG-AATCCCGAGUCCU...                         |         |
| Position 1000-1029 of PLAC2 3' UTR | 5' ...GCCUGAGCCCAAGGAGGAGUUCAGGGAC...<br>   :    :    :  | 7mer-1A |
| hsa-miR-125a                       | 3' ...GUGUCC-AATUUC-CGAG-AGUCCU...                       |         |
| Position 1004-1029 of PLAC2 3' UTR | 5' ...AGGCGCCAG-GAGGUTGACGGGAC...<br>   :    :    :      | 7mer-1A |
| hsa-miR-125b                       | 3' ...AGUUGUUGAUGCCAGAGUCCU...                           |         |
| Position 1130-1159 of PLAC2 3' UTR | 5' ...CCUUAUUUCCUUGU-GCAUUAUCAGGGAC...<br>   :    :    : | 7mer-1A |
| hsa-miR-125b                       | 3' ...AGUU----UUGAUGCCAGAGUCCU...                        |         |
| Position 1133-1159 of PLAC2 3' UTR | 5' ...CCUUAUUUCCUUGU-GCAUUAUCAGGGAC...<br>   :    :    : | 7mer-1A |
| hsa-miR-125a                       | 3' ...GUGUCCAAUUCUUGAGAGUCCU...                          |         |

**G**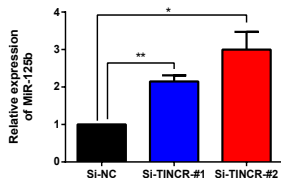**H**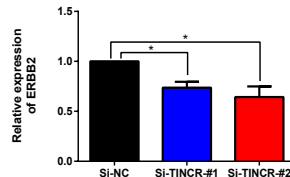

Supplement: MOESM13 [file 13324030]
