# Supplementary material for: Oncogenic long noncoding RNA landscape in breast cancer
Source: Springer Nature journal article supplement (doi:10.1186/s12943-017-0696-6), 2017-07-24
Supplement: MOESM9 [file 13324030]

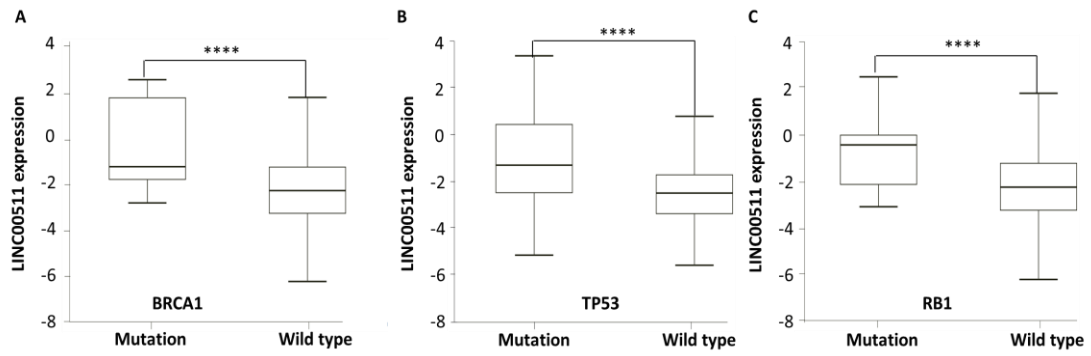

**Figure S1. LINC00511 expression in patients with mutation in TCGA.**

A) LINC00511 expression was higher in patients with BRCA1 mutation than those with wild type.

B) LINC00511 expression was higher in patients with TP53 mutation than those with wild type.

C) LINC00511 expression was higher in patients RB1 mutation than those with wild type.

\*\*\*\* P < 0.0001
