# Supplementary material for: Oncogenic long noncoding RNA landscape in breast cancer
Source: Springer Nature journal article supplement (doi:10.1186/s12943-017-0696-6), 2017-07-24
Supplement: MOESM15 [file 13324030]

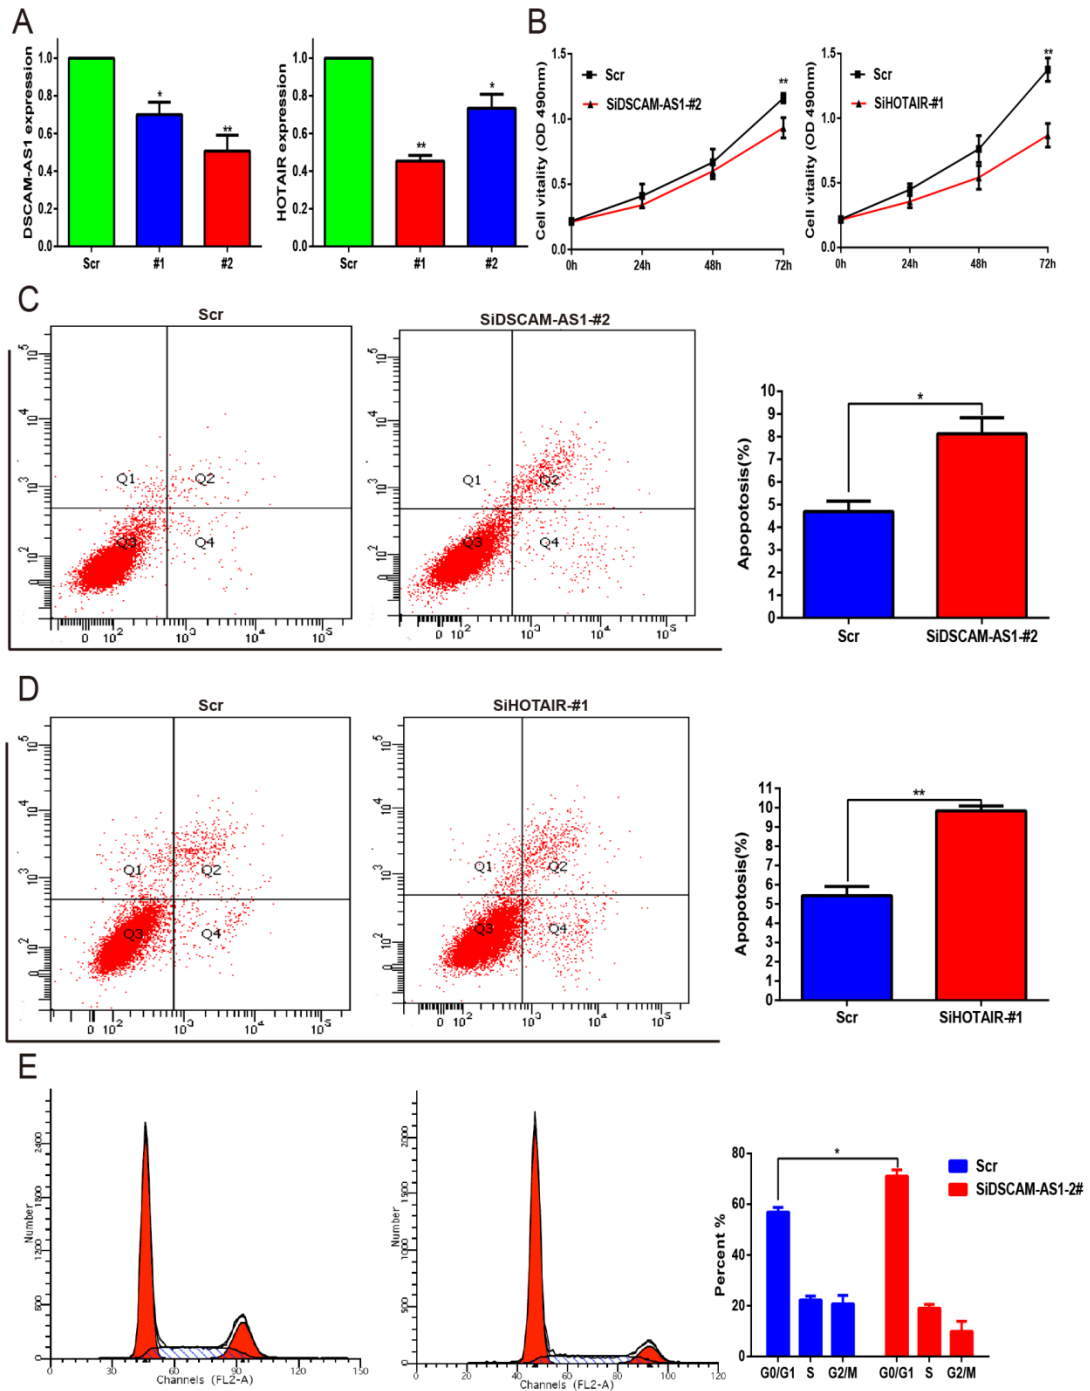

**Figure S2. Oncogenic functions of DSCAM-AS1 and HOTAIR.** A) Knockdown efficiency of siRNAs targeting DSCAM-AS1 and HOTAIR, as determined by qRT-PCR. Quantitative normalization of HOTAIR and DSCAM-AS1 was performed in each sample by using GAPDH expression as an internal control. The relative levels of HOTAIR and DSCAM-AS1 vs. GAPDH were determined by the comparative CT ( $2^{-\Delta\Delta CT}$ ) method. B) The CCK-8 assay was conducted to measure MCF7 and T47D cell proliferation after knockdown of DSCAM-AS1 and HOTAIR, respectively. C-D: Apoptosis analysis of MCF7(C) and T47D (D) cells after knockdown of DSCAM-AS1 and HOTAIR, respectively, via flow cytometry. E) Determination of cell cycle distribution of MCF7 cells after knockdown of DSCAM-AS1 via flow cytometry. \*\*  $P < 0.01$ ; \*  $P < 0.05$ . Each assay was performed in triplicate.
