# Supplementary material for: Oncogenic long noncoding RNA landscape in breast cancer
Source: Mol Cancer. 2017 Jul 24;16:129. doi: 10.1186/s12943-017-0696-6 (PMC5525255; doi:10.1186/s12943-017-0696-6)
Supplement: Supplementary file 1 — The clinicopathological characteristics of the patients. (XLS 19 kb) [file 12943_2017_696_MOESM1_ESM.xls]

## Sheet: Sheet1
Sample	age（year）	size（mm）	type	Grade	LNM	TNM stage	ER	PR	HER2 IHC	HER2 FISH	KI67	P53
LA_0	44	34*19	IDC	II	2/13	IIb	positive 70%	positive 90%	-	negative	0.1	+
LA_1	48	13*10	IDC	II	1/22	IIa	positive 95%	positive 95%	-	negative	0.05	-
LA_2	48	13*12	IDC	II	0/13	I	positive 90%	positive 95%	-	negative	0.1	+
TNB_0	47	20*15	IDC	II	0/15	IIa	negative	negative	-	negative	0.2	-
TNB_1	49	18*16	IDC	II	1/22	IIa	negative	negative	-	negative	0.05	+
TNB_2	46	35*24	IDC	II	0/2	IIa	negative	negative	-	negative	0.8	-
HER2_0	37	13*10	IDC	II	2/22	IIa	negative	negative	3+	positive	0.4	3+
HER2_1	50	16*17	IDC	III	2/30	IIa	negative	negative	3+	positive	0.2	-
HER2_2	52	23*20	IDC	II	1/14	IIb	negative	negative	3+	positive	0.2	-
LB(HER2-)_0	41	30*10	IDC	II	36/42	IIIb	positive 80%	positive 95%	-	negative	0.2	+
LB(HER2-)_1	45	20*15	IDC	II	0/3	IIa	positive 20%	negative	-	negative	0.15	2+
LB(HER2-)_2	47	20*17	IDC	II	0/3	IIa	positive 10%	negative	-	negative	0.1	2+
LB(HER2+)_0	52	41*24	IDC	II	0/12	IIa	positive 95%	positive 30%	3+	positive	0.2	-
LB(HER2+)_1	55	31*20	IDC	II	1/21	IIb	positive 80%	positive 30%	3+	positive	0.2	2+
LB(HER2+)_2	59	9*7	IDC	II	12/12	IIIb	positive 95%	positive 10%	3+	positive	0.2	2+
Normal_0	41
Normal_1	43
Normal_2	45
